# Supplementary material for: Robust immunity to influenza vaccination in haematopoietic stem cell transplant recipients following reconstitution of humoral and adaptive immunity
Source: PubMed Central journal article supplement (PMC10294294; doi:10.1002/cti2.1456), 2023-06-27
Supplement: CTI2-12-e1456-s001.pdf [file CTI2-12-e1456-s001.pdf]

## **Robust immunity to influenza vaccination in haematopoietic stem cell transplant recipients following reconstitution of humoral and adaptive immunity**

Wuji Zhang<sup>1</sup>, Louise C Rowntree<sup>1</sup>, Ramona Muttucumaru<sup>2</sup>, Timon Damelang<sup>1</sup>, Malet Aban<sup>3</sup>, Aeron C Hurt<sup>3,4</sup>, Maria Auladell<sup>1,5</sup>, Robyn Esterbauer<sup>1</sup>, Bruce Wines<sup>6</sup>, Mark Hogarth<sup>6</sup>, Stephen J Turner<sup>7</sup>, Adam K Wheatley<sup>1</sup>, Stephen J Kent<sup>1,8</sup>, Sushrut Patil<sup>9</sup>, Sharon Avery<sup>9</sup>, Orla Morrissey<sup>2</sup>, Amy W Chung<sup>1</sup>, Marios Koutsakos<sup>1\*</sup>, Thi HO Nguyen<sup>1\*</sup>, Allen C Cheng<sup>10,11\*</sup>, Tom C Kotsimbos<sup>12,13\*</sup> and Katherine Kedzierska<sup>1,14\*</sup>

### **Supplementary Data**

#### **List of Supplementary tables**

Supplementary table 1. Age and gender of the HC and HSCT participants  
Supplementary table 2. Demographics of HSCT recipients at enrolment  
Supplementary table 3. Demographics of Low and High A/H3N2 responders  
Supplementary table 4. Flow cytometry antibody panel for PBMC subsets  
Supplementary table 5. Antibody panel for B cell subsets and influenza-specific B cells

#### **List of Supplementary figures**

Supplementary figure 1. Cytokine and chemokine levels at enrollment.  
Supplementary figure 2. Gating strategy for peripheral blood mononuclear cell subsets.  
Supplementary figure 3. Gating strategy for B cell subsets and influenza-specific B cells.  
Supplementary figure 4. Optimization of multiplex bead assay conditions.  
Supplementary figure 5. Reproducibility of the multiplex bead assay.

**Supplementary table 1. Age and gender of the HC and HSCT participants**

|                                              | <b>HC</b><br>(n = 14) | <b>HSCT</b><br>(n = 18) | <b>P-value</b>      |
|----------------------------------------------|-----------------------|-------------------------|---------------------|
| Age at enrollment (years),<br>median (range) | 33 (18-57)            | 35 (21-65)              | 0.6125 <sup>#</sup> |
| Female, n (%)                                | 10 (71.4%)            | 7 (38.9%)               | 0.1493 <sup>^</sup> |

<sup>#</sup>Significance was determined using the Mann-Whitney test; <sup>^</sup>Significance was determined using the Fisher's exact test. Age was unknown for two participants, one in each group. Gender was unknown for one HSCT participant.

**Supplementary table 2. Demographics of HSCT recipients at enrolment**

| HSCT recipients                                                               |                                  | Total<br>(n = 18)     | One dose<br>(n = 7) | Two doses<br>(n = 8) | P-value                          |
|-------------------------------------------------------------------------------|----------------------------------|-----------------------|---------------------|----------------------|----------------------------------|
| Age at enrolment (years), median (range) <sup>Ω</sup>                         |                                  | 35 (21-65)            | 33 (21-52)          | 36.5 (23-50)         | 0.6751 <sup>#</sup>              |
| Age at transplantation (years), median (range) <sup>Ω</sup>                   |                                  | 33 (17-61)            | 28 (17-50)          | 35 (22-47)           | 0.5907 <sup>#</sup>              |
| Female, n (%) <sup>Ω</sup>                                                    |                                  | 7 (38.9%)             | 3 (42.9%)           | 4 (50%)              | ><br>0.9999 <sup>^</sup>         |
| Ethnicity (%)                                                                 | Australian                       | 12 (70.6%)            | 4 (57.1%)           | 7 (87.5%)            | 0.2821 <sup>^</sup> *            |
|                                                                               | Indian                           | 2 (11.1%)             | 1 (14.3%)           | 1 (12.5%)            |                                  |
|                                                                               | English                          | 1 (5.6%)              | 1 (14.3%)           | 0                    |                                  |
|                                                                               | Polish                           | 1 (5.6%)              | 1 (14.3%)           | 0                    |                                  |
|                                                                               | Macedonian                       | 1 (5.6%)              | 0                   | 0                    |                                  |
|                                                                               | Unknown                          | 1 (5.6%)              | 0                   | 0                    |                                  |
| Transplantation-to-vaccination interval (months), median (range) <sup>Ω</sup> |                                  | 29.5 (13.5-119)       | 29.5 (14.5-119)     | 23.25 (13.5-60.5)    | 0.4443 <sup>#</sup>              |
| Past season influenza vaccination, n (%)                                      | Yes                              | 5 (27.8%)             | 3 (42.9%)           | 2 (25%)              | 0.6084 <sup>^</sup> *            |
|                                                                               | None documented                  | 8 (44.4%)             | 4 (57.1%)           | 2 (25%)              |                                  |
|                                                                               | Unknown                          | 5 (27.8%)             | 0                   | 4 (50%)              |                                  |
| Documented influenza infection, n (%)                                         | Yes                              | 2 (11.1%)             | 1 (14.3%)           | 1 (12.5%)            | ><br>0.9999 <sup>^</sup> *       |
|                                                                               | None documented                  | 14 (77.8%)            | 6 (85.7%)           | 6 (75%)              |                                  |
|                                                                               | Unknown                          | 2 (11.1%)             | 0                   | 1 (12.5%)            |                                  |
| Underlying diseases, n (%)                                                    | ALL                              | 2 (11.1%)             | 2 (28.6%)           | 0                    | 0.6084 <sup>^</sup> <sup>Φ</sup> |
|                                                                               | B-ALL                            | 3 (16.7%)             | 1 (14.3%)           | 2 (25%)              |                                  |
|                                                                               | T-ALL                            | 2 (11.1%)             | 1 (14.3%)           | 1 (12.5%)            |                                  |
|                                                                               | Acute myeloid leukemia           | 1 (5.6%)              | 0                   | 1 (12.5%)            |                                  |
|                                                                               | Blastic plasmacytoid DC neoplasm | 1 (5.6%)              | 0                   | 0                    |                                  |
|                                                                               | Chronic myeloid leukemia         | 1 (5.6%)              | 1 (14.3%)           | 0                    |                                  |
|                                                                               | Multiple myeloma                 | 2 (11.1%)             | 1 (14.3%)           | 1 (12.5%)            |                                  |
|                                                                               | Hodgkin's lymphoma               | 2 (11.1%)             | 1 (14.3%)           | 1 (12.5%)            |                                  |
|                                                                               | Marginal zone lymphoma           | 1 (5.6%)              | 0                   | 0                    |                                  |
|                                                                               | Myelodysplasia                   | 1 (5.6%)              | 0                   | 1 (12.5%)            |                                  |
|                                                                               | Myelofibrosis                    | 1 (5.6%)              | 0                   | 1 (12.5%)            |                                  |
|                                                                               | Unknown                          | 1 (5.6%)              | 0                   | 0                    |                                  |
|                                                                               | Donor type, n (%)                | HLA-identical sibling | 9 (50%)             | 4 (57.1%)            |                                  |
| Matched unrelated donor                                                       |                                  | 8 (44.4%)             | 3 (42.9%)           | 4 (50%)              |                                  |
| Unknown                                                                       |                                  | 1 (5.6%)              | 0                   | 0                    |                                  |
| Donor age (years), median (range) <sup>†</sup>                                |                                  | 31 (15-53)            | 35.5 (15-53)        | 32 (26-49)           | 0.9452 <sup>#</sup>              |
| Conditioning regimen, n (%)                                                   | Myeloablative                    | 7 (38.9%)             | 2 (28.6%)           | 4 (50%)              | 0.6084 <sup>^</sup> *            |
|                                                                               | Reduced intensity                | 3 (16.7%)             | 2 (28.6%)           | 1 (12.5%)            |                                  |
|                                                                               | Nonmyeloablative                 | 1 (5.6%)              | 0                   | 1 (12.5%)            |                                  |
|                                                                               | Unknown                          | 7 (38.9%)             | 3 (42.9%)           | 2 (25%)              |                                  |
| Previous GvHD, n (%)                                                          | Yes                              | 7 (38.9%)             | 2 (28.6%)           | 4 (50%)              | 0.6084 <sup>^</sup> *            |
|                                                                               | None documented                  | 8 (44.4%)             | 4 (57.1%)           | 3 (37.5%)            |                                  |
|                                                                               | Unknown                          | 3 (16.7%)             | 1 (14.3%)           | 1 (12.5%)            |                                  |
| Ongoing GvHD, n (%)                                                           | Yes                              | 4 (22.2%)             | 1 (14.3%)           | 3 (37.5%)            | 0.5692 <sup>^</sup> *            |
|                                                                               | None documented                  | 11 (61.1%)            | 6 (85.7%)           | 3 (37.5%)            |                                  |
|                                                                               | Unknown                          | 3 (16.7%)             | 0                   | 2 (25%)              |                                  |
| Immunosuppressive treatment, n (%)                                            | None                             | 5 (27.8%)             | 3 (42.9%)           | 2 (25%)              | 0.6084 <sup>^</sup> *            |
|                                                                               | Cyclosporin                      | 3 (16.7%)             | 0                   | 2 (25%)              |                                  |
|                                                                               | Prednisolone                     | 1 (5.6%)              | 0                   | 1 (12.5%)            |                                  |
|                                                                               | Cyclosporin + Prednisolone       | 1 (5.6%)              | 0                   | 1 (12.5%)            |                                  |
|                                                                               | Prednisolone + Tacrolimus        | 1 (5.6%)              | 0                   | 1 (12.5%)            |                                  |
|                                                                               | Brentuximab                      | 1 (5.6%)              | 1 (14.3%)           | 0                    |                                  |
|                                                                               | Thalidomide                      | 1 (5.6%)              | 1 (14.3%)           | 0                    |                                  |
|                                                                               | Bortezomib                       | 1 (5.6%)              | 0                   | 0                    |                                  |
|                                                                               | Unknown                          | 4 (22.2%)             | 2 (28.6%)           | 1 (12.5%)            |                                  |

<sup>#</sup>Significance was determined using the Mann-Whitney test; <sup>^</sup>Significance was determined using the Fisher's exact test; \*Comparison between the first row and combining the other rows; <sup>Φ</sup>Grouped by all leukemia and others; <sup>Ω</sup>Data were unknown for one participant; <sup>†</sup>Data were unknown for three participants. Significance was determined between HSCT recipients that received one or two IIV dose(s). ALL, acute lymphoblastic leukemia; GvHD, graft versus host disease.

**Supplementary table 3. Demographics of Low and High A/H3N2 responders**

| Clinical data                                                    |                            | Low responders<br>(n = 7) | High responders<br>(n = 8) | P-value                          |
|------------------------------------------------------------------|----------------------------|---------------------------|----------------------------|----------------------------------|
| Age at enrollment (years), median (range)                        |                            | 33 (21-52)                | 49 (21-50)                 | 0.2171 <sup>#</sup>              |
| Age at transplantation (years), median (range)                   |                            | 29 (20-50)                | 42 (17-48)                 | 0.2948 <sup>#</sup>              |
| Female, n (%)                                                    |                            | 3 (42.9%)                 | 4 (50%)                    | > 0.9999 <sup>^</sup>            |
| Ethnicity (%)                                                    | Australian                 | 5 (71.4%)                 | 6 (75%)                    | >                                |
|                                                                  | Indian                     | 1 (14.2%)                 | 1 (12.5%)                  |                                  |
|                                                                  | English                    | 0                         | 1 (12.5%)                  |                                  |
|                                                                  | Polish                     | 1 (14.2%)                 | 0                          |                                  |
| Transplantation-to-vaccination interval (months), median (range) |                            | 14.5 (13.5-56)            | 40.5 (20.5-119)            | 0.0193 <sup>#</sup>              |
| Vaccination-to-blood collection interval (days), median (range)  |                            | 49 (28-118)               | 45.5 (29-85)               | 0.4120 <sup>#</sup>              |
| Past season influenza vaccination, n (%)                         | Yes                        | 2 (28.6%)                 | 3 (37.5%)                  | >                                |
|                                                                  | None documented            | 2 (28.6%)                 | 4 (50%)                    |                                  |
|                                                                  | Unknown                    | 3 (42.9%)                 | 1 (12.5%)                  |                                  |
| Documented influenza infection, n (%)                            | Yes                        | 0                         | 2 (25%)                    | 0.4667 <sup>^</sup> *            |
|                                                                  | None documented            | 6 (85.7%)                 | 6 (75%)                    |                                  |
|                                                                  | Unknown                    | 1 (14.2%)                 | 0                          |                                  |
|                                                                  | ALL                        | 1 (14.2%)                 | 1 (12.5%)                  |                                  |
| Underlying diseases, n (%)                                       | B-ALL                      | 3 (42.9%)                 | 0                          | 0.6084 <sup>^</sup> <sup>Φ</sup> |
|                                                                  | T-ALL                      | 0                         | 2 (25%)                    |                                  |
|                                                                  | Acute myeloid leukemia     | 0                         | 1 (12.5%)                  |                                  |
|                                                                  | Chronic myeloid leukemia   | 1 (14.2%)                 | 0                          |                                  |
|                                                                  | Multiple Myeloma           | 0                         | 2 (25%)                    |                                  |
|                                                                  | Hodgkins Lymphoma          | 1 (14.2%)                 | 1 (12.5%)                  |                                  |
| Donor type, n (%)                                                | Myelodysplasia             | 1 (14.2%)                 | 0                          | 0.6193 <sup>^</sup>              |
|                                                                  | Myelofibrosis              | 0                         | 1 (12.5%)                  |                                  |
|                                                                  | HLA-identical sibling      | 3 (42.9%)                 | 5 (62.5%)                  |                                  |
|                                                                  | Matched unrelated donor    | 4 (57.1%)                 | 3 (37.5%)                  |                                  |
| Donor age (years), median (range)                                |                            | 28.5 (20-53)              | 45 (15-52)                 | 0.3660 <sup>#</sup>              |
| Conditioning regimen, n (%)                                      | Myeloablative              | 4 (57.1%)                 | 2 (25%)                    | 0.3147 <sup>^</sup> *            |
|                                                                  | Reduced intensity          | 0                         | 3 (37.5%)                  |                                  |
|                                                                  | Nonmyeloablative           | 1 (14.2%)                 | 0                          |                                  |
| Previous GvHD, n (%)                                             | Unknown                    | 2 (28.6%)                 | 3 (37.5%)                  | >                                |
|                                                                  | Yes                        | 3 (42.9%)                 | 3 (37.5%)                  |                                  |
|                                                                  | None documented            | 3 (42.9%)                 | 4 (50%)                    |                                  |
| Ongoing GvHD, n (%)                                              | Unknown                    | 1 (14.2%)                 | 1 (12.5%)                  | 0.9999 <sup>^</sup> *            |
|                                                                  | Yes                        | 1 (14.2%)                 | 2 (25%)                    |                                  |
|                                                                  | None documented            | 4 (57.1%)                 | 6 (75%)                    |                                  |
|                                                                  | Unknown                    | 2 (28.6%)                 | 0                          |                                  |
| Immunosuppressive treatment, n (%)                               | None                       | 4 (57.1%)                 | 1 (12.5%)                  | 0.3147 <sup>^</sup> *            |
|                                                                  | Cyclosporin                | 1 (14.2%)                 | 1 (12.5%)                  |                                  |
|                                                                  | Prednisolone               | 0                         | 1 (12.5%)                  |                                  |
|                                                                  | Cyclosporin + Prednisolone | 0                         | 1 (12.5%)                  |                                  |
|                                                                  | Prednisolone + Tacrolimus  | 1 (14.2%)                 | 0                          |                                  |
|                                                                  | Brentuximab                | 0                         | 1 (12.5%)                  |                                  |
|                                                                  | Thalidomide                | 0                         | 1 (12.5%)                  |                                  |
|                                                                  | Unknown                    | 1 (14.2%)                 | 2 (25%)                    |                                  |

<sup>#</sup>Significance was determined using the Mann-Whitney test; <sup>^</sup>Significance was determined using the Fisher's exact test; \*Comparison between the first row and combining the other rows; <sup>Φ</sup>Grouped by all leukemia and others. ALL, acute lymphoblastic leukemia; GvHD, graft versus host disease.

**Supplementary table 4. Flow cytometry antibody panel for PBMC subsets**

| Antibody            | Clone       | Fluorochrome    | Dilution | Vendor                                       |
|---------------------|-------------|-----------------|----------|----------------------------------------------|
| $\gamma\delta$ -TCR | 11F2        | FITC            | 1:30     | BD                                           |
| CD8                 | SK1         | PerCP-Cy5.5     | 1:200    | BD Pharmingen                                |
| CD3                 | UCHT1       | APC             | 1:100    | eBioscience, CA, USA                         |
| CD16                | 3G8         | Alexa Fluor 700 | 1:100    | BioLegend, CA, USA                           |
| CD45RA              | HI100       | APC-H7          | 1:50     | BD Pharmingen                                |
| HLA-DR              | L243        | V450            | 1:100    | BD                                           |
| Live/Dead           |             | Aqua            | 1:500    | Molecular Probes, Life Technologies, CA, USA |
| CD161               | HP-3G10     | BV605           | 1:50     | BioLegend                                    |
| CD4                 | SK3         | BV650           | 1:200    | BD Horizon                                   |
| CD27                | L128        | BV711           | 1:100    | BD Horizon                                   |
| CD56                | NCAM16.2    | BV786           | 1:100    | BD Horizon                                   |
| TCRV $\alpha$ 7.2   | 3C1D        | PE              | 1:400    | BioLegend                                    |
| CD19                | J3-199      | ECD             | 1:100    | Beckman Coulter, CA, USA                     |
| CD14                | M $\Phi$ P9 | PE-Cy7          | 1:50     | BD Pharmingen                                |

**Supplementary table 5. Antibody panel for B cell subsets and influenza-specific B cells**

| Antibody  | Clone   | Fluorochrome    | Dilution | Vendor           |
|-----------|---------|-----------------|----------|------------------|
| H3 rHA    | N/A     | APC             | N/A      | Made in-house    |
| CD20      | 2H7     | Alexa Fluor 700 | 1:150    | BD               |
| IgM       | G20-127 | BUV395          | 1:150    | BD               |
| CD21      | B-ly4   | BUV737          | 1:300    | BD               |
| BPHU      |         | BV421           | N/A      | In-house         |
| Free SA   |         | BV510           | 1:600    | BD Horizon       |
| Live/Dead |         | Aqua            | 1:500    | Molecular Probes |
| CD3       | OKT3    | BV510           | 1:600    | BioLegend        |
| CD8       | RPA-T8  | BV510           | 1:1500   | BioLegend        |
| CD10      | HI10a   | BV510           | 1:750    | BioLegend        |
| CD14      | M5E2    | BV510           | 1:300    | BioLegend        |
| CD16      | 3G8     | BV510           | 1:500    | BioLegend        |
| CD27      | O323    | BV605           | 1:150    | BioLegend        |
| IgG       | G18-145 | BV786           | 1:75     | BD               |
| H1 rHA    | N/A     | PE              | N/A      | Made in-house    |
| CD19      | J3-119  | ECD             | 1:150    | Beckman          |
| IgD       | IA6-2   | PE-Cy7          | 1:500    | BD               |

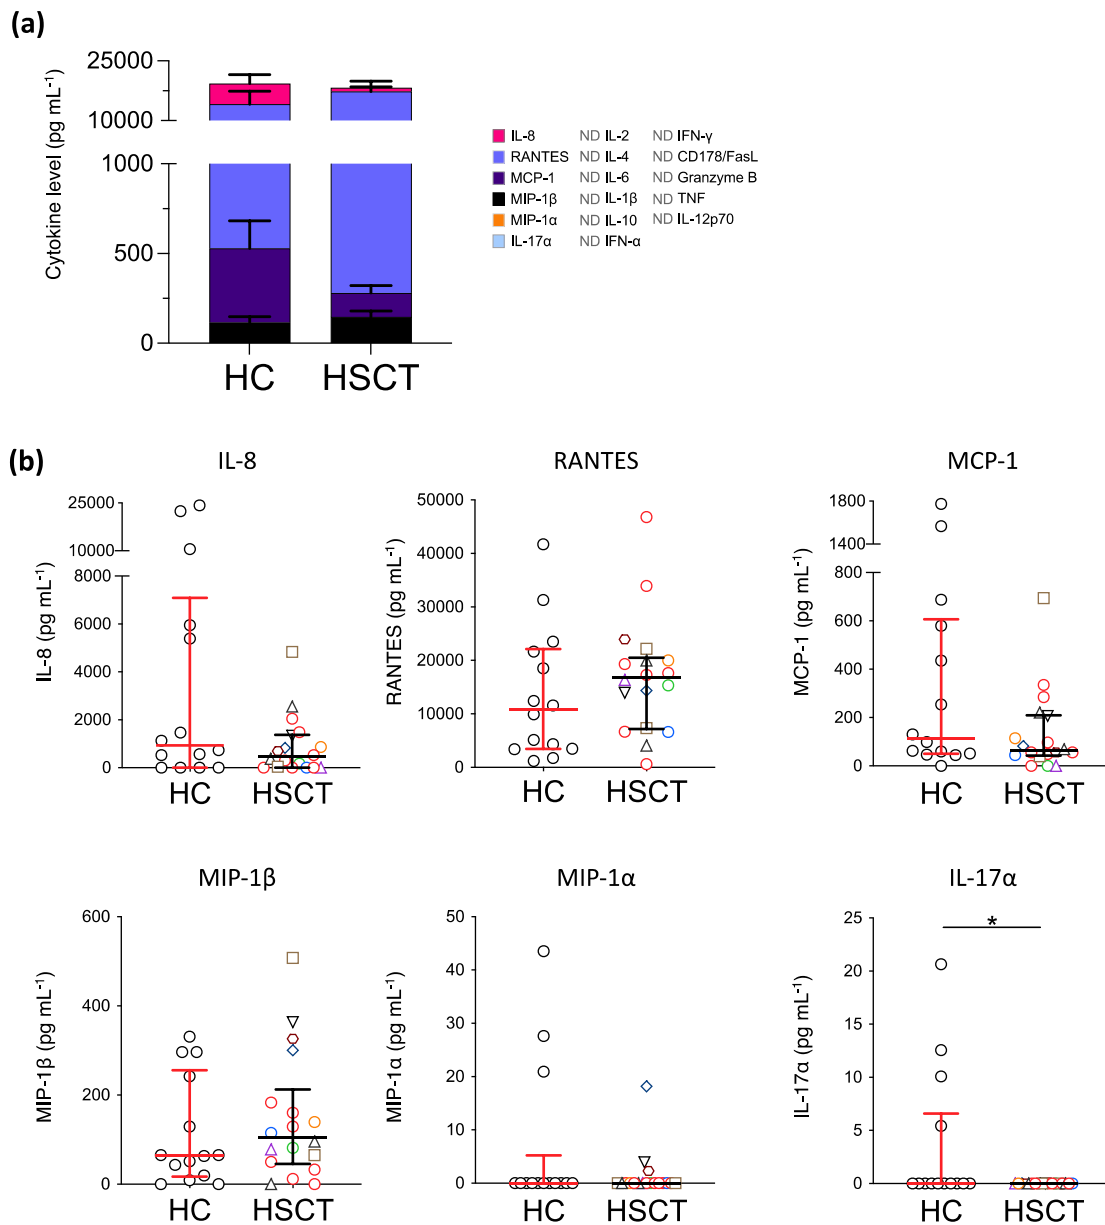

**Supplementary figure 1. Cytokine and chemokine levels at enrollment.** The levels of 17 cytokines in serum collected at enrollment were measured for both healthy control ( $n_{\text{HC}} = 14$ ) and HSCT ( $n_{\text{HSCT}} = 18$ ) groups using cytometric bead array. **(a)** Stacked bar graph indicates mean concentration of cytokines (+ SEM). Cytokines and chemokines shown as ND had a non-detectable concentration below  $10 \text{ pg ml}^{-1}$ . **(b)** Serum concentration of IL-8, RANTES, MCP-1, MIP-1 $\beta$ , MIP-1 $\alpha$ , and IL-17 $\alpha$ . Bars indicate the median and interquartile range. Symbols of HSCT recipients were the same as in Figure 1b. Technical replicates were not performed due to limited patient samples. Statistical significance between the two groups was determined using the Mann-Whitney  $U$ -test ( $*P < 0.05$ ).

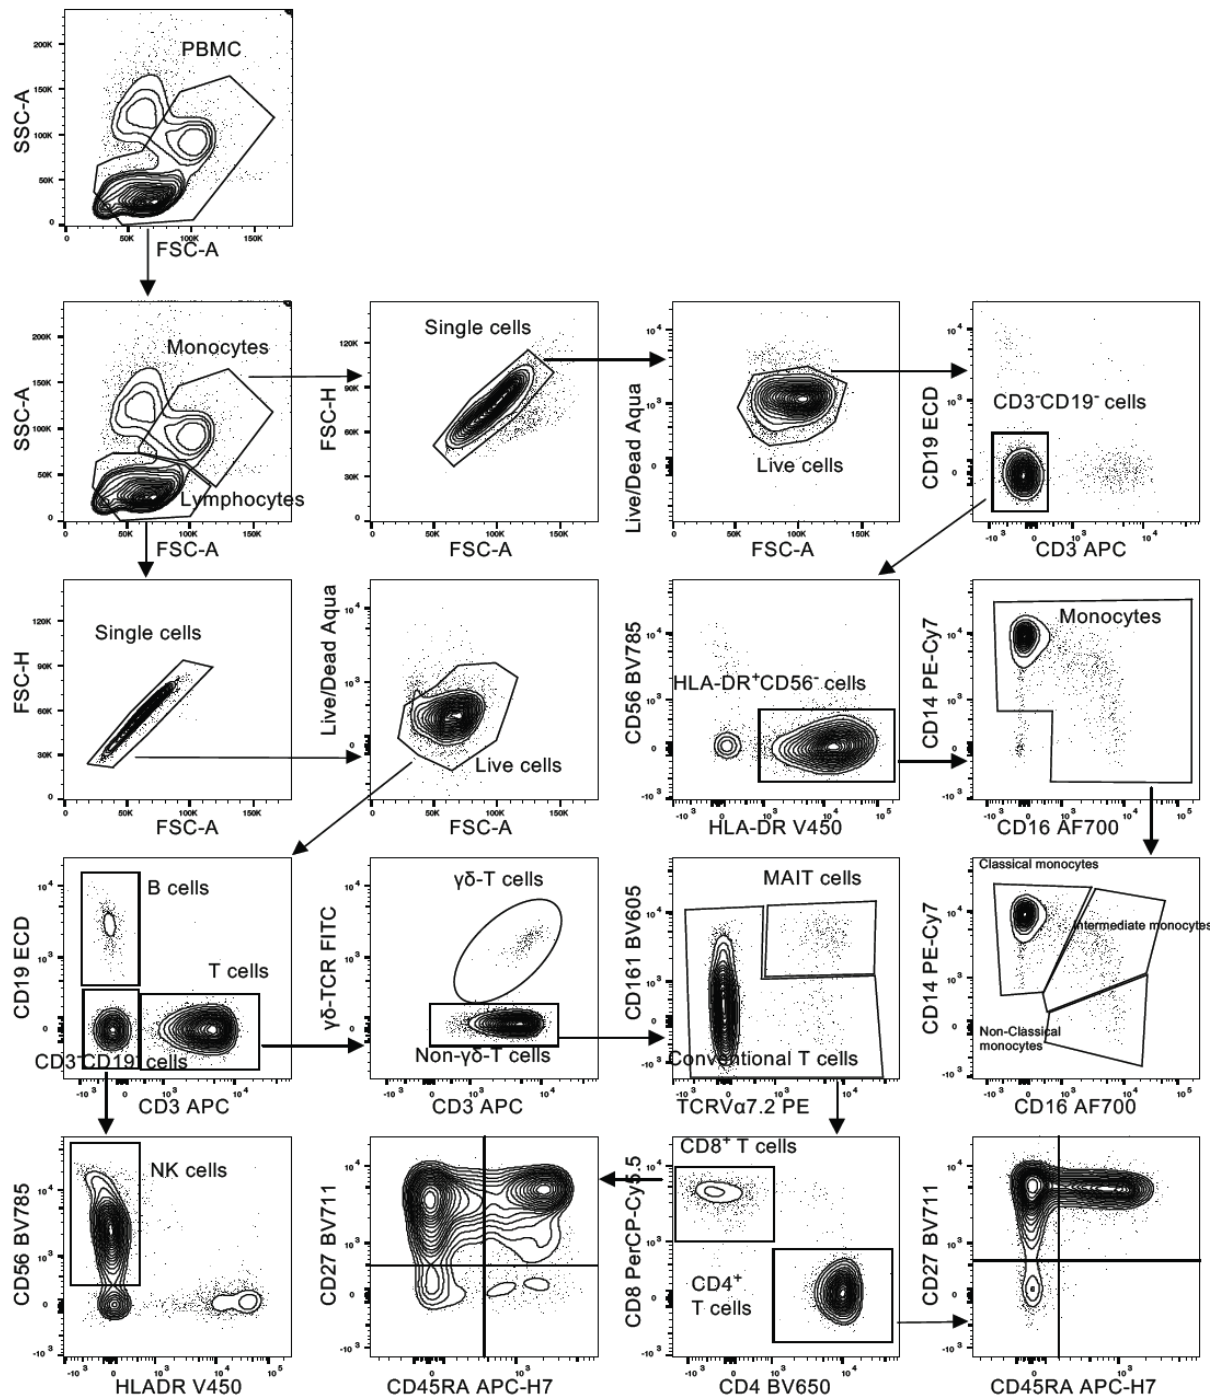

**Supplementary figure 2. Gating strategy for peripheral blood mononuclear cell subsets.**

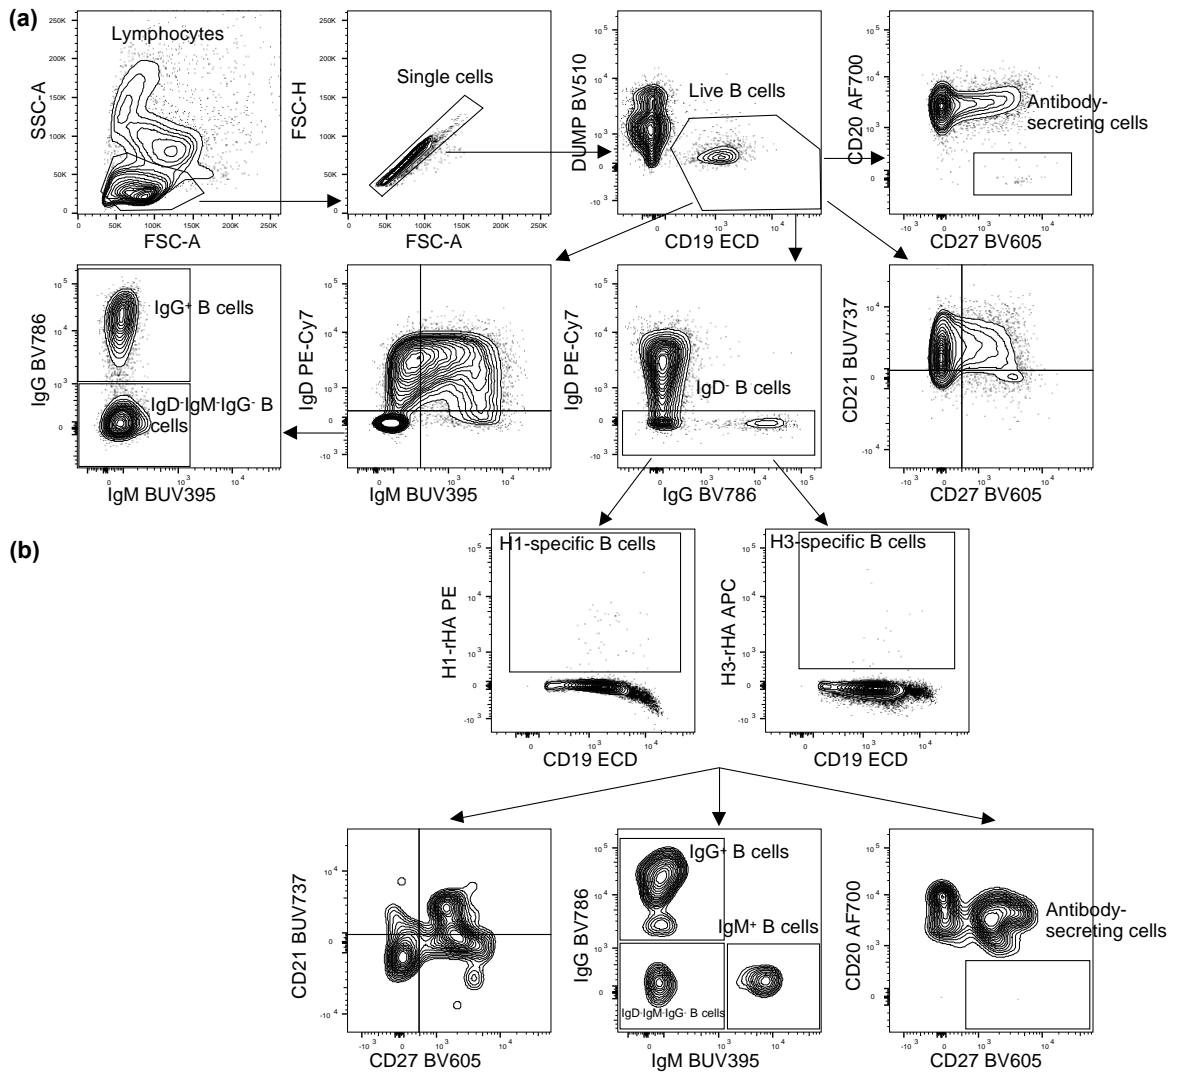

**Supplementary figure 3. Gating strategy for B cell subsets and influenza-specific B cells.**



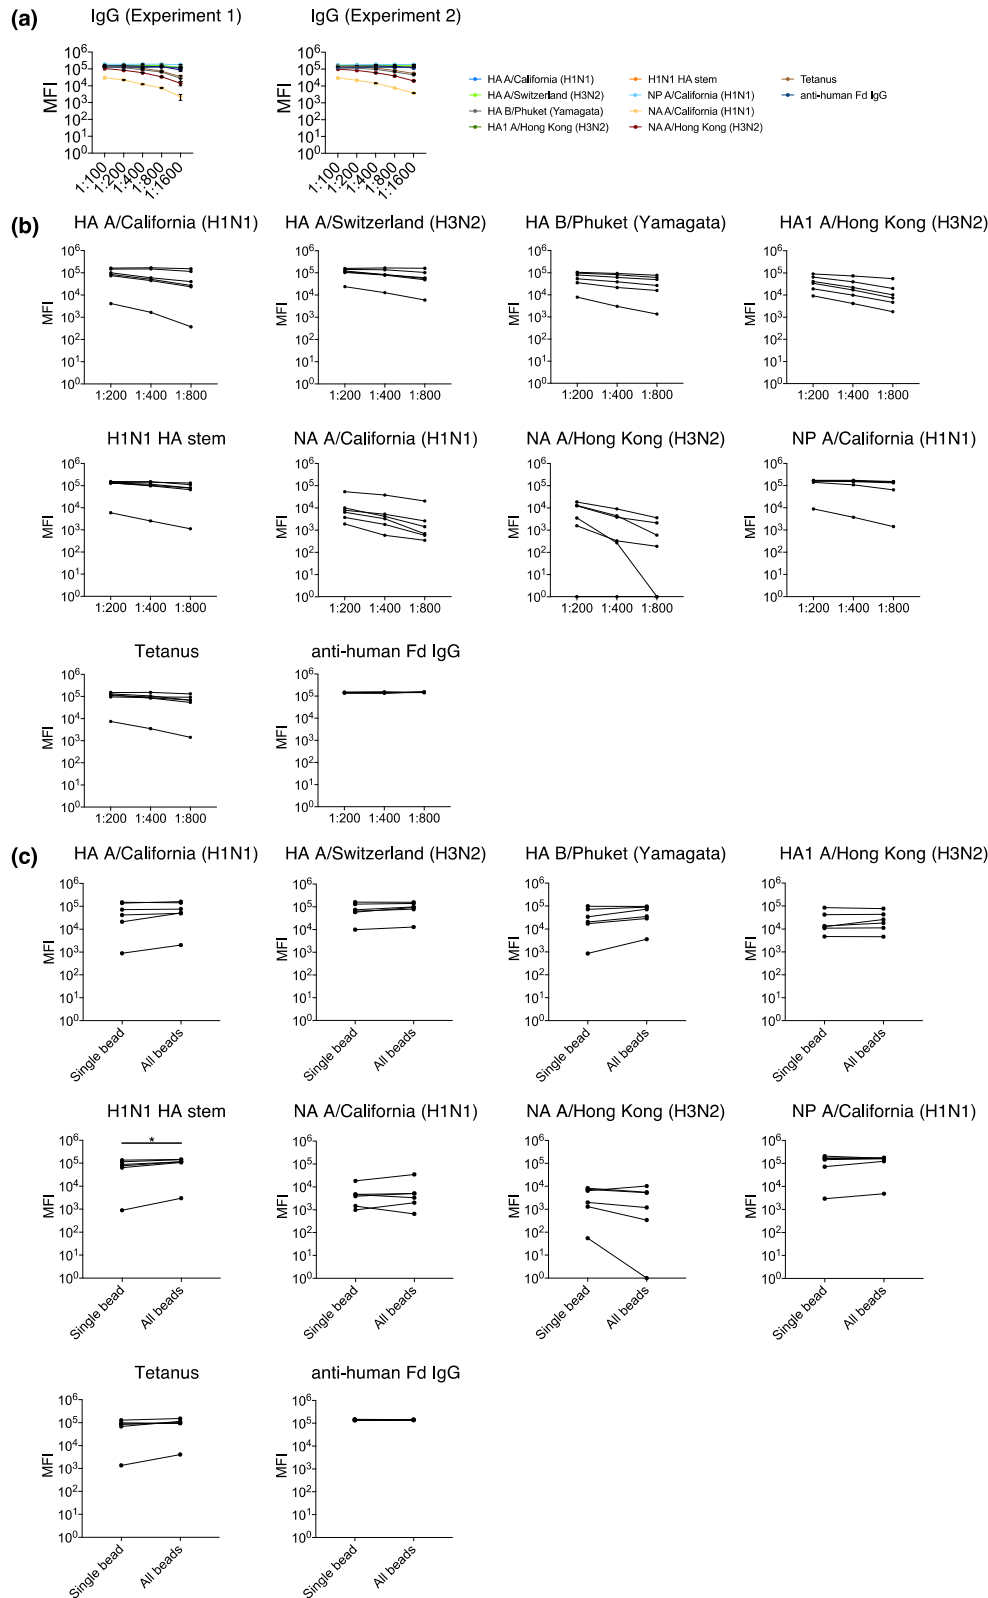

**Supplementary figure 4. Optimization of multiplex bead assay conditions.** (a) Two-fold serial dilution (1:100 to 1:1600) of a positive sample pool using IgG detector antibody. (b) Two-fold serial dilution (1:200 to 1:800) of 6 selected BMT-V cohort serum samples with divergent HAI titres using IgG detector antibody. (c) MFI value of six randomly selected BMT-V cohort samples when using single bead or all beads pooled together. Significance was determined using the Wilcoxon test ( $*P < 0.05$ ).
